# Supplementary material
Source: HighWire-hosted journal article supplement (https://qualitysafety.bmj.com/content/31/11/787)

## Supplementary Material

**Supplementary Table 1: Studies that addressed accuracy of indication documentation compared to gold standard**

| Author, Year         | Location of indication documentation             | Presence of CPOE | Accuracy gold standard          | Presence of standards for indication documentation | Prevalence of accurate prescriptions |
|----------------------|--------------------------------------------------|------------------|---------------------------------|----------------------------------------------------|--------------------------------------|
| Beardsley J, 2020    | With prescription (e.g., orders)                 | Yes              | Chart review                    | Yes                                                | 161/180 (89%)                        |
| Conard N, 2021       | With prescription (e.g., orders)                 | Yes              | Chart review or diagnostic code | Yes                                                | 3463/4178 (83%)                      |
| Heil E.L, 2018       | With prescription (e.g., orders)                 | Yes              | Chart review                    | Yes                                                | 356/396 (90%)                        |
| Khadem T., 2018      | With prescription (e.g., orders)                 | Yes              | Chart review                    | Yes                                                | 30/122 (25%)                         |
| Lee T, 2017          | With prescription (e.g., orders)                 | Yes              | Chart review                    | No                                                 | 39/50 (78%)                          |
| Livengood S.J., 2020 | With prescription (e.g., orders)                 | Yes              | Diagnostic Code                 | No                                                 | 43279/135516 (32%)                   |
| Mary B, 2019         | With prescription (e.g., orders)                 | Yes              | Chart review                    | Yes                                                | 237/304 (78%)                        |
| McCoy D, 2017        | With prescription (e.g., orders)                 | Yes              | Chart review                    | No                                                 | 67/86 (78%)                          |
| McKittrick M, 2017   | Elsewhere in health record (e.g., patient chart) | Not specified    | Chart review                    | No                                                 | 33/33 (100%)                         |
| Ratliff A, 2020      | With prescription (e.g., orders)                 | Yes              | Chart review                    | Yes                                                | 80/99 (81%)                          |
| Scardina T, 2020     | With prescription (e.g., orders)                 | Yes              | Chart review                    | Yes                                                | 129/284 (45%)                        |
| Sola-Bonada N., 2013 | With prescription (e.g., orders)                 | Yes              | Unclear                         | No                                                 | 182/250 (73%)                        |
| Timmons V., 2018     | With prescription (e.g., orders)                 | Yes              | Chart review                    | Yes                                                | 121/154 (79%)                        |
| Wang N., 2018        | With prescription (e.g., orders)                 | Yes              | Chart review                    | Yes                                                | 728/899 (81%)                        |

*CPOE: computerized provider order entry*

**Supplementary Table 2: Studies that assessed interventions on indication documentation**

| Author, Year           | Intervention                                                                                                                                        | EPOC taxonomy              | Outcome*                                    | Outcome direction* |
|------------------------|-----------------------------------------------------------------------------------------------------------------------------------------------------|----------------------------|---------------------------------------------|--------------------|
| Allan PA, 2016         | Educational campaign, audit and feedback to prescribers                                                                                             | Combination                | Prevalence of indication documentation (Rx) | Improved +39%      |
| Arnold M, 2020         | Posters, verbal and electronic communication were used to educate staff of the prescribing requirements.                                            | Educational materials      | Prevalence of indication documentation (Rx) | Improved +12%      |
| Ashiru-Oredope D, 2011 | New hospital chart                                                                                                                                  | Other                      | Prevalence of indication documentation (Rx) | Improved +26%      |
| Baysari M, 2017        | Drop down indications                                                                                                                               | Health information systems | Indication accuracy (Rx)                    | Decreased -20%     |
| Bowers T, 2020         | E-prescribing                                                                                                                                       | Health information systems | Prevalence of indication documentation (Rx) | Improved +18%      |
| Charani E, 2017        | Mobile app for prescribing policy                                                                                                                   | Other                      | Prevalence of indication documentation (Rx) | Declined -16%      |
| Chatzapolou D, 2020    | Education and quality improvement: posters, awareness campaign                                                                                      | Educational materials      | Prevalence of indication documentation (ns) | Improved +53%      |
| Chaves N, 2014         | Audit and feedback to ICU staff at group meetings, Yellow medication record reminder sticker on medication record                                   | Combination                | Prevalence of indication documentation (Rx) | Improved +25%      |
| Chilton N, 2010        | Audit and feedback                                                                                                                                  | Audit and feedback         | Prevalence of indication documentation (Rx) | Improved +24%      |
| Coll A, 2012           | Audit and feedback                                                                                                                                  | Audit and feedback         | Prevalence of indication documentation (Rx) | Improved +35%      |
| Cooley N, 2012         | Automatic stop dates, electronic prescribing systems, medication charts with specific areas for antibiotic prescriptions and education and training | Combination                | Prevalence of indication documentation (ns) | Improved +20%      |
| Cunney R, 2019         | Front line ownership/meetings update guidelines, audit and feedback, PDSA cycles                                                                    | Combination                | Prevalence of indication documentation      | Improved +70%      |

|                                                                   |                                                                                                                                                       |                            | (chart)                                     |                         |
|-------------------------------------------------------------------|-------------------------------------------------------------------------------------------------------------------------------------------------------|----------------------------|---------------------------------------------|-------------------------|
| Davis G, 2019                                                     | Behaviour modification via teaching, prescription policy, drug chart changes                                                                          | Combination                | Prevalence of indication documentation (ns) | Not specified           |
| De Terline D, 2014                                                | Informed clinical units in writing of the results of a survey on prescribing quality and the objective to improve prescribing .                       | Audit and feedback         | Prevalence of indication documentation (Rx) | Declined -11%           |
| Doukas F, 2020                                                    | Audit and feedback                                                                                                                                    | Audit and feedback         | Prevalence of indication documentation (ns) | Improved +23%           |
| Howard P, 2011                                                    | Mandatory indication in patient's notes, then mandatory indication on prescription, education through briefings and screen savers, audit and feedback | Combination                | Prevalence of indication documentation (Rx) | Improved +27%           |
| Infectious Diseases Institute – Makerere University, Uganda, 2020 | Audit and feedback, guidelines, education, commitment letters                                                                                         | Combination                | Prevalence of indication documentation (Rx) | Improved +25%           |
| Johnston D.N., 2019                                               | Education- teaching session following first audit, group level audit/feedback                                                                         | Audit and feedback         | Prevalence of indication documentation (Rx) | Improved +37%           |
| Jones T, 2019                                                     | Self-review tool (yellow sticker reminder)                                                                                                            | Reminder                   | Prevalence of indication documentation (Rx) | Improved +17%           |
| Kirrane M, 2016                                                   | Front line ownership/meetings, update to guidelines, reminders, audit and feedback, PDSA cycles                                                       | Combination                | Prevalence of indication documentation (ns) | Improved +70%           |
| Lamba V, 2020                                                     | PDSA- team meetings, interviews, order set standardization                                                                                            | Continuous quality         | Prevalence of indication documentation (Rx) | Improved p=0.049        |
| Lee A, 2021                                                       | Educational session, microbiology rounds on surgical inpatients, intro of e-prescribing w/ prompt                                                     | Combination                | Prevalence of indication documentation (Rx) | Improved +18%           |
| Metcalfe J, 2017                                                  | Mandatory free text indication for restricted antimicrobials                                                                                          | Health information systems | Prevalence of indication documentation (Rx) | Improved +43%           |
| Moore A, 2020                                                     | When a pharmacist identifies a prescription error, the prescriber is sent feedback about this error                                                   | Audit and feedback         | Prevalence of indication documentation (Rx) | Improved, not specified |
| Neels A J, 2020                                                   | Teaching session                                                                                                                                      | Educational meetings       | Prevalence of indication documentation (ns) | Improved, not specified |

|                                                       |                                                                                                                                  |                              |                                                |                 |
|-------------------------------------------------------|----------------------------------------------------------------------------------------------------------------------------------|------------------------------|------------------------------------------------|-----------------|
| Oshun P, 2021                                         | Education and feedback with antibiotic policy                                                                                    | Educational meetings         | Prevalence of indication documentation (chart) | Improved +44%   |
| Roberts E, 2015                                       | Prospective audit and feedback                                                                                                   | Audit and feedback           | Prevalence of indication documentation (chart) | Improved +6%    |
| Rojoa D, 2019                                         | Microbiology proforma                                                                                                            | Other                        | Prevalence of indication documentation (Rx)    | Improved +54%   |
| Seaton R, 1999                                        | Survey on clinical record keeping and feedback at team meeting                                                                   | Audit and feedback           | Prevalence of indication documentation (chart) | Improved +11%   |
| Surat G, 2021                                         | Implementation of local ASP: PAF, metrics, restrictions, antibiograms, electronic guideline access (none targeted at indication) | Combination                  | Prevalence of indication documentation (chart) | Declined -0.5%  |
| Triantafillou M, 2011                                 | Guidelines and antibiotic restrictions                                                                                           | Clinical practice guidelines | Prevalence of indication documentation (Rx)    | Improved p=0.71 |
| West Hertfordshire Hospitals NHS Trust, NHS, UK, 2020 | New drug chart with indication documentation                                                                                     | Other                        | Prevalence of indication documentation (Rx)    | Improved +84%   |
| Yeo J.M., 2016                                        | Pocket card, checklist, posters, team meetings and certificates for involvement in QI process                                    | Combination                  | Prevalence of indication documentation (chart) | Improved +72%   |

\*all changes absolute unless otherwise specified\*Rx: documentation with prescription, chart: documentation on chart/elsewhere on health record, ns: not specified

**Supplementary Table 3. Studies that evaluated association between indication documentation and prescribing and patient outcomes**

| Study                             | Setting   | Intervention                                                                                                                                      | Main Outcome                                                                                      | Outcome Direction*                                                       |
|-----------------------------------|-----------|---------------------------------------------------------------------------------------------------------------------------------------------------|---------------------------------------------------------------------------------------------------|--------------------------------------------------------------------------|
| Chan AJ, 2018 (observational)     | Hospital  | Mandatory indication for selected antimicrobials (Rx)                                                                                             | Antibiotic DOTs                                                                                   | Improved<br>-18 days of therapy/1000 patient days                        |
| Gong C, 2019 (observational)      | Community | Accountable justification for antibiotics for acute respiratory infections (Rx)                                                                   | Quality adjusted life years<br>Costs to clinic                                                    | Improved<br>+0.06 QALY<br>-\$5.39                                        |
| Goss F.R., 2020 (observational)   | Hospital  | Indication-based prescribing (Rx)                                                                                                                 | Antibiotic appropriateness (Guideline concordance - antibiotic selection)                         | Improved<br>+5%                                                          |
| Gunn L, 2018 (observational)      | Hospital  | Mandatory indication for fluoroquinolones (Rx)                                                                                                    | Fluoroquinolone prescribing rate                                                                  | Improved<br>-8%                                                          |
| Hansen B, 2021 (observational)    | Hospital  | Pharmacist driven contact with prescriber. Alert firing based on provider-selected indication where orders did not meet restriction criteria (ns) | Rate of adherence to antibiotic restriction                                                       | Improved<br>+6%                                                          |
| Haynes K, 2011 (observational)    | Hospital  | Order set (Rx)                                                                                                                                    | Timely discontinuation of antibiotic therapy                                                      | Improved<br>+17%                                                         |
| Jones T, 2019 (observational)     | Hospital  | Reminder sticker (Rx)                                                                                                                             | Antimicrobial appropriateness (Guideline concordance)                                             | Improved<br>+16%                                                         |
| Liang H. Y., 2015 (observational) | Hospital  | Mandatory indication (Rx)                                                                                                                         | Antibiotic appropriateness (Not specified)                                                        | Improved<br>Not specified                                                |
| Linder J, 2017 (randomized)       | Community | Accountable justification for acute respiratory tract infections (12 months after intervention stopped; see Meeker 2016) (Rx)                     | Antibiotic appropriateness (Antibiotic non-prescribing for indications not requiring antibiotics) | Increase in inappropriate prescribing after stopping intervention, +4.1% |
| Marshall MB, 2017 (observational) | Hospital  | Mandatory indication (Rx)                                                                                                                         | Antimicrobial defined daily doses                                                                 | Improved<br>-189 DDD/1000 patient days                                   |
| Meeker D., 2016 (randomized)      | Community | Accountable justification for acute respiratory tract infections (Rx)                                                                             | Antibiotic appropriateness (Antibiotic non-prescribing for indications not requiring antibiotics) | Improved<br>+18%                                                         |
| Nash CB, 2015 (observational)     | Hospital  | Switch from restriction with pre-authorization to indication-based prescribing (Rx)                                                               | Antibiotic days of therapy                                                                        | No change<br>Not specified                                               |

|                                  |           |                                                                                                |                                                                                                                      |                                                                                                         |
|----------------------------------|-----------|------------------------------------------------------------------------------------------------|----------------------------------------------------------------------------------------------------------------------|---------------------------------------------------------------------------------------------------------|
| Nomura Y, 2018 (observational)   | Hospital  | Mandatory provider-selected indication (Rx)                                                    | Antibiotic appropriateness (Guideline concordance - antibiotic selection and dosing)                                 | Improved +0.5%                                                                                          |
| Persell S, 2014 (randomized)     | Community | Education and prompt for accountable justification (Rx)                                        | Antibiotic appropriateness (Antibiotic non-prescribing for indications not requiring antibiotics)                    | Improved +20%                                                                                           |
| Reyes C., 2016 (observational)   | Hospital  | Multimodal intervention including Mandatory indication and electronic health record alert (Rx) | Meropenem appropriateness (based on selection and dosage) and utilization                                            | Improved +33%<br>Selection<br>Meropenem days/1000 patient days and length of therapy per admission -60% |
| Stocker M, 2012 (observational)  | Hospital  | Mandatory checklist requiring indication and antibiotic timeout (checklist)                    | Antibiotic appropriateness (empiric selection, duration of therapy, targeted selection)                              | Improved +56%<br>empiric selection<br>Duration of therapy <3d +17%                                      |
| Thakkar K., 2011 (observational) | Hospital  | Multimodal intervention regarding policy for indication documentation (Rx and Chart)           | Antibiotic appropriateness (Guideline concordance - selection based on policy or infectious diseases recommendation) | Improved +41%                                                                                           |
| Wagner JL, 2020 (observational)  | Hospital  | Indication documentation (ns)                                                                  | Clinical success                                                                                                     | Improved +6%                                                                                            |
| Wirtz A., 2020 (observational)   | Hospital  | Mandatory indication and antibiotic timeout (Rx)                                               | Days of therapy                                                                                                      | Improved -14 DOT/1000 patient days                                                                      |

\*all changes absolute unless otherwise specified

\*Rx: documentation with prescription, chart: documentation on chart/elsewhere on health record, checklist: documented indication on checklist ns: not specified

Supplementary Figure 1. Visual Abstract of Key Messages and Next Steps for Indication Documentation

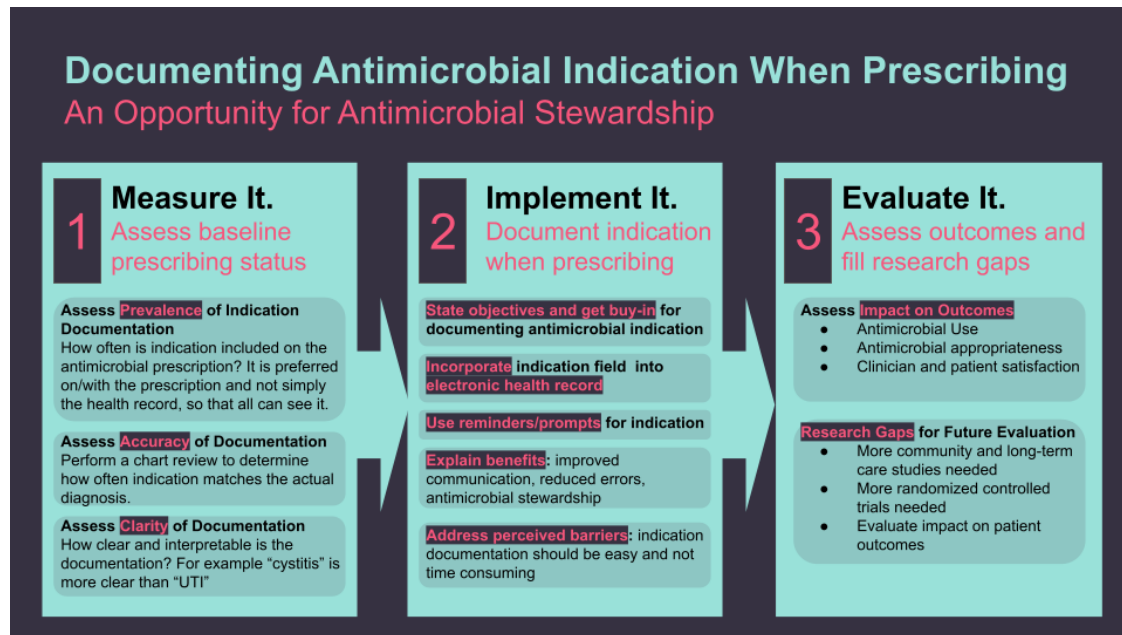

Supplement: inline-supplementary-material-2 [file inline-supplementary-material-2.pdf]
