# Supplementary material
Source: HighWire-hosted journal article supplement (https://qualitysafety.bmj.com/content/31/11/787)
Supplement: inline-supplementary-material-1 [file inline-supplementary-material-1.pdf]

**Supplementary Material**

## L I T E R A T U R E   S E A R C H

07/06/2021

## Search results reporting

**DATABASES SEARCHED**

| Database                                           | Date searched | Records | Duplicates removed by database | Remaining |
|----------------------------------------------------|---------------|---------|--------------------------------|-----------|
| MEDLINE                                            | 07/06/2021    | 862     | 0                              | 862       |
| Embase                                             | 07/06/2021    | 675     | 0                              | 675       |
| CINAHL                                             | 07/06/2021    | 320     | 0                              | 320       |
| International<br>Pharmaceutical<br>Abstracts (IPA) | 07/06/2021    | 429     | 0                              | 429       |

**RESULTS TOTALS**

| Records source                                          | Records |
|---------------------------------------------------------|---------|
| Records identified through database searching           | 2286    |
| Duplicates removed by database                          | 0       |
| Duplicates removed by bibliographic management software | 165     |
| Total records after duplicates removed                  | 2121    |

## Search strategies

**MEDLINE**

Ovid MEDLINE(R) ALL &lt;1946 to July 02, 2021&gt;

| # | Searches                                                                                                                                                                                                                                                                                                                                              | Results |
|---|-------------------------------------------------------------------------------------------------------------------------------------------------------------------------------------------------------------------------------------------------------------------------------------------------------------------------------------------------------|---------|
| 1 | Anti-Infective Agents/ or Anti-Infective Agents, Urinary/ or Anti-Bacterial Agents/ or Antibiotic Prophylaxis/ or Antifungal Agents/ or Antiviral Agents/ or Antimicrobial Stewardship/ or (anti-infective* or antiinfective* or anti-biotic* or antibiotic* or anti-microb* or antimicrob* or antibacterial* or anti-bacterial*).ti,kf,kw.           | 625207  |
| 2 | Drug Prescriptions/ or Prescriptions/ or Electronic Prescribing/ or Prescription Drugs/ or Drug Therapy/st or drug therapy, combination/st or Drug Utilization/st or *Prescription Drug Misuse/ or *Prescription Drug Overuse/ or Deprescriptions/ or Inappropriate Prescribing/ or Cross Infection/dt or Bacterial Infections/dt or Polypharmacy/ or | 192538  |

|   |                                                                                                                                                                                                                                                                                                                                                                                                                                                                                                                                                                                                                                                                                                                                                                                                                                                                                                                                                                                                                                                                                                                                                                                                                                                                                                                                                                                                                                                                                                                                                                                                                                                                                                                                                                                                                                                                                                                                                                                                                                                                                                                                 |       |
|---|---------------------------------------------------------------------------------------------------------------------------------------------------------------------------------------------------------------------------------------------------------------------------------------------------------------------------------------------------------------------------------------------------------------------------------------------------------------------------------------------------------------------------------------------------------------------------------------------------------------------------------------------------------------------------------------------------------------------------------------------------------------------------------------------------------------------------------------------------------------------------------------------------------------------------------------------------------------------------------------------------------------------------------------------------------------------------------------------------------------------------------------------------------------------------------------------------------------------------------------------------------------------------------------------------------------------------------------------------------------------------------------------------------------------------------------------------------------------------------------------------------------------------------------------------------------------------------------------------------------------------------------------------------------------------------------------------------------------------------------------------------------------------------------------------------------------------------------------------------------------------------------------------------------------------------------------------------------------------------------------------------------------------------------------------------------------------------------------------------------------------------|-------|
|   | (prescription* or prescrib* or e-prescrib* or e-prescription* or deprescrib* or de-prescrib* or overprescrib* or medication* or (drug* adj2 (therapy or therapies or treatment*))).ti,kf,kw.                                                                                                                                                                                                                                                                                                                                                                                                                                                                                                                                                                                                                                                                                                                                                                                                                                                                                                                                                                                                                                                                                                                                                                                                                                                                                                                                                                                                                                                                                                                                                                                                                                                                                                                                                                                                                                                                                                                                    |       |
| 3 | (*Drug Labeling/ or Drug Labeling/mt, st or *Practice Patterns, Physicians'/ or Practice Patterns, Physicians'/st, sn or *Practice Guidelines as Topic/ or Practice Guidelines as Topic/st or Medical Errors/pc or Inappropriate Prescribing/pc, sn or Medication Errors/pc or *"Off-Label Use"/ or Medical Order Entry Systems/ or Clinical Pharmacy Information Systems/ or Natural Language Processing/ or Drug Information Services/ or Pharmaceutical Services/ or *Pharmacies/st or Pharmacy Service, Hospital/st or Pharmaceutical Preparations/ad, st or Medication Systems, Hospital/st or Decision Support Systems, Clinical/ or Quality Control/ or Quality Improvement/ or *Guideline Adherence/ or Guideline Adherence/st, sn or Terminology as Topic/ or Vocabulary, Controlled/ or Medication Reconciliation/ or Patient Education as Topic/ or Patient Safety/ or Patient-Centered Care/ or Self Administration/st or Decision Making/ or Disclosure/ or Communication/ or Documentation/ or Records/st or Writing/ or Handwriting/ or Contraindications, Drug/ or Contraindications/ or Malpractice/) and (indication-based or indication-specific or indicate* or indicating or indication* or "prescription-indication*" or "indication code*" or rationale or rationalization or non-indicat* or non-indication* or "not indicated" or "without indicating" or "missing indication" or "reason for use" or "reason for indication" or "reason for prescribing" or "purpose for use" or "accountable justification" or "indication* for use" or "indication* of use" or "instruction* for use" or "indication* for treatment*" or "documentation of indication*" or "indication documentation*" or "order writing" or "writing process*" or legible or legibility or illegibility or illegible or "notation* of purpose" or "take as directed" or "take as needed" or "use as needed" or "use as directed" or ((guideline* or standard* or "best practice*") adj2 (prescrib* or e-prescrib* or prescription* or e-prescription* or deprescrib* or de-prescrib* or "prescription-indication*"))).ti,ab,kf,kw. | 54295 |
| 4 | 1 and 2 and 3                                                                                                                                                                                                                                                                                                                                                                                                                                                                                                                                                                                                                                                                                                                                                                                                                                                                                                                                                                                                                                                                                                                                                                                                                                                                                                                                                                                                                                                                                                                                                                                                                                                                                                                                                                                                                                                                                                                                                                                                                                                                                                                   | 713   |
| 5 | ((((indication-based or indication-specific or indicate* or indicating or indication* or rationale or rationalization* or non-indicat* or non-indication* or "not indicated" or "without indicating" or "missing indication") adj2 (prescription* or prescrib* or e-prescrib* or e-prescription* or deprescrib* or de-prescrib* or overprescrib* or medication* or drug* or therapy or therapies or treatment* or "use" or usage or administration or administer* or instruction* or direction* or order or orders or course* or duration* or dose or doses or dosing or dosage or regimen* or timing or schedule* or frequency or documentation or documented or reason* or purpose* or label* or off-label or provider-selected or physician* or appropriate* or inappropriate* or correct* or incorrect* or missing or without)) or "prescription-indication*" or "indication code*" or "indication* for use" or "indication* of use" or "instruction* for use" or "indication* for treatment*" or "documentation of indication*" or "indication documentation*" or                                                                                                                                                                                                                                                                                                                                                                                                                                                                                                                                                                                                                                                                                                                                                                                                                                                                                                                                                                                                                                                          | 4523  |

|    |                                                                                                                                                                                                                                                                                                                                                                                                                                                                                                                                                                                                                                                                                                                                                                                                                               |      |
|----|-------------------------------------------------------------------------------------------------------------------------------------------------------------------------------------------------------------------------------------------------------------------------------------------------------------------------------------------------------------------------------------------------------------------------------------------------------------------------------------------------------------------------------------------------------------------------------------------------------------------------------------------------------------------------------------------------------------------------------------------------------------------------------------------------------------------------------|------|
|    | "reason for use" or "reason for indication" or "reason for prescribing" or "purpose for use" or "accountable justification" or "notation* of purpose" or "take as directed" or "take as needed" or "use as needed" or "use as directed" or "order writing" or "writing process*").ti,kf,kw. or ("prescription-indication*" or "indication code*" or "indication* for use" or "indication* of use" or "instruction* for use" or "indication* for treatment*" or "documentation of indication*" or "indication documentation*" or "reason for use" or "reason for indication" or "reason for prescribing" or "purpose for use" or "accountable justification" or "notation* of purpose" or "take as directed" or "take as needed" or "use as needed" or "use as directed" or "order writing" or "writing process*").ab. /freq=2 |      |
| 6  | (1 or 2) and 5                                                                                                                                                                                                                                                                                                                                                                                                                                                                                                                                                                                                                                                                                                                                                                                                                | 535  |
| 7  | 4 or 6                                                                                                                                                                                                                                                                                                                                                                                                                                                                                                                                                                                                                                                                                                                                                                                                                        | 1230 |
| 8  | 7 not (exp central nervous system agents/ or exp psychotropic drugs/ or exp antidepressive agents/ or exp peripheral nervous system agents/ or exp analgesics/ or exp narcotics/ or exp Analgesics, Opioid/ or exp hematologic agents/ or anticoagulants/ or ((narcotic* or opioid* or fentanyl or analgesic* or naloxone or anti-depress* or anti-depress* or antipsychotic* or anti-psychotic* or psychiatric or psychoses or psychotropic or anticoagulant* or antiplatelet* or stroke*) adj2 (drug* or prescription* or prescrib* or e-prescrib* or e-prescription* or deprescrib* or de-prescrib* or overprescrib* or medication* or treatment* or therapy or therapies)).ti,kf,kw.)                                                                                                                                     | 1110 |
| 9  | 8 not (exp Animals/ not Humans/)                                                                                                                                                                                                                                                                                                                                                                                                                                                                                                                                                                                                                                                                                                                                                                                              | 1099 |
| 10 | 9 not (comment or editorial or letter or news).pt.                                                                                                                                                                                                                                                                                                                                                                                                                                                                                                                                                                                                                                                                                                                                                                            | 1056 |
| 11 | limit 10 to yr="1990 -Current"                                                                                                                                                                                                                                                                                                                                                                                                                                                                                                                                                                                                                                                                                                                                                                                                | 983  |
| 12 | limit 11 to english                                                                                                                                                                                                                                                                                                                                                                                                                                                                                                                                                                                                                                                                                                                                                                                                           | 862  |

## EMBASE

Ovid Embase <1974 to 2021 Week 26>

| # | Searches                                                                                                                                                                                                                                                                                                                                                                                                                                                                                                  | Results |
|---|-----------------------------------------------------------------------------------------------------------------------------------------------------------------------------------------------------------------------------------------------------------------------------------------------------------------------------------------------------------------------------------------------------------------------------------------------------------------------------------------------------------|---------|
| 1 | antiinfective agent/ or urinary tract antiinfective agent/ or antibiotic agent/ or antibiotic prophylaxis/ or antifungal agent/ or antiviral agent/ or antimicrobial stewardship/ or (anti-infective* or antiinfective* or anti-biotic* or antibiotic* or anti-microb* or antimicrob* or antibacterial* or anti-bacterial*).ti,kw.                                                                                                                                                                        | 783081  |
| 2 | prescription/ or electronic prescribing/ or prescription drug/ or *drug therapy/ or *combination drug therapy/ or *drug utilization/ or *prescription drug misuse/ or *medication overuse/ or deprescription/ or inappropriate prescribing/ or cross infection/dt or bacterial infection/dt or polypharmacy/ or (prescription* or prescrib* or e-prescrib* or e-prescription* or deprescrib* or de-prescrib* or overprescrib* or medication* or (drug* adj2 (therapy or therapies or treatment*))).ti,kw. | 612944  |
| 3 | (drug labeling/ or *clinical practice/ or *practice guideline/ or medical error/pc or inappropriate prescribing/pc or medication error/pc or *"off label drug use"/ or physician                                                                                                                                                                                                                                                                                                                          | 163144  |

order entry system/ or medical information system/ or natural language processing/ or drug information/ or "pharmacy (shop)"/ or hospital pharmacy/ or hospital organization/ or clinical decision support system/ or quality control/ or total quality management/ or \*protocol compliance/ or nomenclature/ or controlled vocabulary/ or medication therapy management/ or patient education/ or patient safety/ or patient care/ or drug self administration/ or decision making/ or interpersonal communication/ or medical documentation/ or documentation/ or information processing/ or writing system/ or writing/ or handwriting/ or drug contraindication/ or contraindication/ or malpractice/) and (indication-based or indication-specific or indicate\* or indicating or indication\* or "prescription-indication\*" or "indication code\*" or rationale or rationalization or non-indicat\* or non-indication\* or "not indicated" or "without indicating" or "missing indication" or "reason for use" or "reason for indication" or "reason for prescribing" or "purpose for use" or "accountable justification" or "indication\* for use" or "indication\* of use" or "instruction\* for use" or "indication\* for treatment\*" or "documentation of indication\*" or "indication documentation\*" or "order writing" or "writing process\*" or legible or legibility or illegibility or illegible or "notation\* of purpose" or "take as directed" or "take as needed" or "use as needed" or "use as directed" or ((guideline\* or standard\* or "best practice\*") adj2 (prescrib\* or e-prescrib\* or prescription\* or e-prescription\* or deprescrib\* or de-prescrib\* or "prescription-indication\*"))).ti,ab,kw.

4 1 and 2 and 3 1392

5 (((indication-based or indication-specific or indicate\* or indicating or indication\* or rationale or rationalization\* or non-indicat\* or non-indication\* or "not indicated" or "without indicating" or "missing indication") adj2 (prescription\* or prescrib\* or e-prescrib\* or e-prescription\* or deprescrib\* or de-prescrib\* or overprescrib\* or medication\* or drug\* or therapy or therapies or treatment\* or "use" or usage or administration or administer\* or instruction\* or direction\* or order or orders or course\* or duration\* or dose or doses or dosing or dosage or regimen\* or timing or schedule\* or frequency or documentation or documented or reason\* or purpose\* or label\* or off-label or provider-selected or physician\* or appropriate\* or inappropriate\* or correct\* or incorrect\* or missing or without)) or "prescription-indication\*" or "indication code\*" or "indication\* for use" or "indication\* of use" or "instruction\* for use" or "indication\* for treatment\*" or "documentation of indication\*" or "indication documentation\*" or "reason for use" or "reason for indication" or "reason for prescribing" or "purpose for use" or "accountable justification" or "notation\* of purpose" or "take as directed" or "take as needed" or "use as needed" or "use as directed" or "order writing" or "writing process\*").ti,kw. or ("prescription-indication\*" or "indication code\*" or "indication\* for use" or "indication\* of use" or "instruction\* for use" or "indication\* for treatment\*" or "documentation of indication\*" or "indication documentation\*" or "reason for use" or "reason for indication" or "reason for prescribing" or "purpose for use" or "accountable justification" or "notation\* of purpose" or "take as directed" or "take as needed" or "use

|    |                                                                                                                                                                                                                                                                                                                                                                                                                                                                                                                                                                                                                                                                                                                                              |      |
|----|----------------------------------------------------------------------------------------------------------------------------------------------------------------------------------------------------------------------------------------------------------------------------------------------------------------------------------------------------------------------------------------------------------------------------------------------------------------------------------------------------------------------------------------------------------------------------------------------------------------------------------------------------------------------------------------------------------------------------------------------|------|
|    | as needed" or "use as directed" or "order writing" or "writing process*").ab. /freq=2                                                                                                                                                                                                                                                                                                                                                                                                                                                                                                                                                                                                                                                        |      |
| 6  | (1 or 2) and 5                                                                                                                                                                                                                                                                                                                                                                                                                                                                                                                                                                                                                                                                                                                               | 945  |
| 7  | 4 or 6                                                                                                                                                                                                                                                                                                                                                                                                                                                                                                                                                                                                                                                                                                                                       | 2309 |
| 8  | 7 not (exp central nervous system agents/ or exp psychotropic agent/ or exp antidepressant agent/ or exp "agents acting on the peripheral nervous and neuromuscular systems"/ or exp analgesic agent/ or exp narcotic agent/ or exp narcotic analgesic agent/ or exp hematologic agent/ or anticoagulant agent/ or ((narcotic* or opioid* or fentanyl or analgesic* or naloxone or anti-depress* or anti-depress* or antipsychotic* or anti-psychotic* or psychiatric or psychoses or psychotropic or anticoagulant* or antiplatelet* or stroke*) adj2 (drug* or prescription* or prescrib* or e-prescrib* or e-prescription* or deprescrib* or de-prescrib* or overprescrib* or medication* or treatment* or therapy or therapies)).ti,kw.) | 1669 |
| 9  | 8 not ((exp animal/ or animal experiment/ or nonhuman/) not exp human/)                                                                                                                                                                                                                                                                                                                                                                                                                                                                                                                                                                                                                                                                      | 1651 |
| 10 | 9 not (editorial or letter or note).pt.                                                                                                                                                                                                                                                                                                                                                                                                                                                                                                                                                                                                                                                                                                      | 1584 |
| 11 | limit 10 to yr="1990 -Current"                                                                                                                                                                                                                                                                                                                                                                                                                                                                                                                                                                                                                                                                                                               | 1485 |
| 12 | limit 11 to english language                                                                                                                                                                                                                                                                                                                                                                                                                                                                                                                                                                                                                                                                                                                 | 1296 |
| 13 | 12 not (1* or 2* or 3* or 4* or 5* or 6* or 7* or 8* or 9*).pm.                                                                                                                                                                                                                                                                                                                                                                                                                                                                                                                                                                                                                                                                              | 675  |

## CINAHL

EBSCOhost CINAHL Complete

| #  | Query                                                                                                                                                                                                                                                                                                                                                                                                                                                                                                                                                                                                                                                                                                                                                                      | Limiters/Expanders            | Results |
|----|----------------------------------------------------------------------------------------------------------------------------------------------------------------------------------------------------------------------------------------------------------------------------------------------------------------------------------------------------------------------------------------------------------------------------------------------------------------------------------------------------------------------------------------------------------------------------------------------------------------------------------------------------------------------------------------------------------------------------------------------------------------------------|-------------------------------|---------|
| S1 | ( (MH "Antiinfective Agents+") OR (MH "Antibiotic Prophylaxis") OR (MH "Antimicrobial Stewardship") ) OR ( TI ( anti-infective* OR antiinfective* OR anti-biotic* OR antibiotic* OR anti-microb* OR antimicrob* OR antibacterial* OR anti-bacterial*) ) OR SU ( (anti-infective* OR antiinfective* OR anti-biotic* OR antibiotic* OR anti-microb* OR antimicrob* OR antibacterial* OR anti-bacterial*) ) OR MW ( (anti-infective* OR antiinfective* OR anti-biotic* OR antibiotic* OR anti-microb* OR antimicrob* OR antibacterial* OR anti-bacterial*) ) )                                                                                                                                                                                                                | Search modes - Boolean/Phrase | 181,156 |
| S2 | ( (MH "Prescriptions, Drug") OR (MH "Drugs, Prescription") OR (MH "Drug Therapy/ST") OR (MH "Drug Therapy, Combination/ST") OR (MH "Drug Therapy, Computer Assisted/ST") OR (MH "Drug Utilization/ST") OR (MH "Deprescribing") OR (MH "Inappropriate Prescribing") OR (MH "Cross Infection/DT") OR (MH "Bacterial Infections/DT") OR (MH "Polypharmacy") ) OR ( TI ( prescription* OR prescrib* OR e-prescrib* OR e-prescription* OR deprescrib* OR de-prescrib* OR overprescrib* OR medication* OR (drug* N2 (therapy OR therapies OR treatment*))) ) OR SU ( prescription* OR prescrib* OR e-prescrib* OR e-prescription* OR deprescrib* OR de-prescrib* OR overprescrib* OR medication* OR (drug* N2 (therapy OR therapies OR treatment*))) ) OR MW ( (prescription* OR | Search modes - Boolean/Phrase | 650,001 |

|    |                                                                                                                                                                                                                                                                                                                                                                                                                                                                                                                                                                                                                                                                                                                                                                                                                                                                                                                                                                                                                                                                                                                                                                                                                                                                                                                                                                                                                                                                                                                                                                                                                                                                                                                                                                                                                                                                                                                                                                                                                                                                                                                                                                                                                                                                                                                                                                                                                                                                                                                                                                                                                                                                                                                                                                                                                                                                                                                                                                                                                                                                            |                               |        |
|----|----------------------------------------------------------------------------------------------------------------------------------------------------------------------------------------------------------------------------------------------------------------------------------------------------------------------------------------------------------------------------------------------------------------------------------------------------------------------------------------------------------------------------------------------------------------------------------------------------------------------------------------------------------------------------------------------------------------------------------------------------------------------------------------------------------------------------------------------------------------------------------------------------------------------------------------------------------------------------------------------------------------------------------------------------------------------------------------------------------------------------------------------------------------------------------------------------------------------------------------------------------------------------------------------------------------------------------------------------------------------------------------------------------------------------------------------------------------------------------------------------------------------------------------------------------------------------------------------------------------------------------------------------------------------------------------------------------------------------------------------------------------------------------------------------------------------------------------------------------------------------------------------------------------------------------------------------------------------------------------------------------------------------------------------------------------------------------------------------------------------------------------------------------------------------------------------------------------------------------------------------------------------------------------------------------------------------------------------------------------------------------------------------------------------------------------------------------------------------------------------------------------------------------------------------------------------------------------------------------------------------------------------------------------------------------------------------------------------------------------------------------------------------------------------------------------------------------------------------------------------------------------------------------------------------------------------------------------------------------------------------------------------------------------------------------------------------|-------------------------------|--------|
| S3 | <p>prescrib* OR e-prescrib* OR e-prescription* OR deprescrib* OR de-prescrib* OR overprescrib* OR medication* OR (drug* N2 (therapy OR therapies OR treatment*)) ) )</p> <p>( (MH "Drug Labeling/MT/ST") OR (MM "Practice Patterns") OR (MH "Inappropriate Prescribing/PC") OR (MH "Medication Errors/PC") OR (MH "Treatment Errors/PC") OR (MH "Electronic Order Entry") OR (MH "Clinical Pharmacy Information Systems") OR (MH "Natural Language Processing") OR (MH "Drug Information Services") OR (MH "Pharmacy, Retail/ST") OR (MH "Pharmacy Service/ST") OR (MH "Medication Management/ST") OR (MH "Decision Support Systems, Clinical") OR (MH "Quality Improvement") OR (MM "Guideline Adherence") OR (MH "Vocabulary, Controlled") OR (MH "Medication Reconciliation") OR (MH "Patient Safety") OR (MH "Patient Centered Care") OR (MH "Self Administration/ST") OR (MH "Decision Making") OR (MH "Decision Making, Clinical") OR (MH "Communication") OR (MH "Documentation") OR (MH "Handwriting") OR (MH "Malpractice") ) ) AND ( TI ( (indication-based OR indication-specific OR indicate* OR indicating OR indication* OR "prescription-indication*" OR "indication code*" OR rationale OR rationalization OR non-indicat* OR non-indication* OR "not indicated" OR "without indicating" OR "missing indication" OR "reason for use" OR "reason for indication" OR "reason for prescribing" OR "purpose for use" OR "accountable justification" OR "indication* for use" OR "indication* of use" OR "instruction* for use" OR "indication* for treatment*" OR "documentation of indication*" OR "indication documentation*" OR "order writing" OR "writing process*" OR legible OR legibility OR illegibility OR illegible OR "notation* of purpose" OR "take as directed" OR "take as needed" OR "use as needed" OR "use as directed" OR ((guideline* OR standard* OR "best practice*") N2 (prescrib* OR e-prescrib* OR prescription* OR e-prescription* OR deprescrib* OR de-prescrib* OR "prescription-indication*")) ) OR AB ( (indication-based OR indication-specific OR indicate* OR indicating OR indication* OR "prescription-indication*" OR "indication code*" OR rationale OR rationalization OR non-indicat* OR non-indication* OR "not indicated" OR "without indicating" OR "missing indication" OR "reason for use" OR "reason for indication" OR "reason for prescribing" OR "purpose for use" OR "accountable justification" OR "indication* for use" OR "indication* of use" OR "instruction* for use" OR "indication* for treatment*" OR "documentation of indication*" OR "indication documentation*" OR "order writing" OR "writing process*" OR legible OR legibility OR illegibility OR illegible OR "notation* of purpose" OR "take as directed" OR "take as needed" OR "use as needed" OR "use as directed" OR ((guideline* OR standard* OR "best practice*") N2 (prescrib* OR e-prescrib* OR prescription* OR e-prescription* OR deprescrib* OR de-prescrib* OR "prescription-indication*")) ) OR MW ( (indication-based OR</p> | Search modes - Boolean/Phrase | 22,340 |
|----|----------------------------------------------------------------------------------------------------------------------------------------------------------------------------------------------------------------------------------------------------------------------------------------------------------------------------------------------------------------------------------------------------------------------------------------------------------------------------------------------------------------------------------------------------------------------------------------------------------------------------------------------------------------------------------------------------------------------------------------------------------------------------------------------------------------------------------------------------------------------------------------------------------------------------------------------------------------------------------------------------------------------------------------------------------------------------------------------------------------------------------------------------------------------------------------------------------------------------------------------------------------------------------------------------------------------------------------------------------------------------------------------------------------------------------------------------------------------------------------------------------------------------------------------------------------------------------------------------------------------------------------------------------------------------------------------------------------------------------------------------------------------------------------------------------------------------------------------------------------------------------------------------------------------------------------------------------------------------------------------------------------------------------------------------------------------------------------------------------------------------------------------------------------------------------------------------------------------------------------------------------------------------------------------------------------------------------------------------------------------------------------------------------------------------------------------------------------------------------------------------------------------------------------------------------------------------------------------------------------------------------------------------------------------------------------------------------------------------------------------------------------------------------------------------------------------------------------------------------------------------------------------------------------------------------------------------------------------------------------------------------------------------------------------------------------------------|-------------------------------|--------|

|    |                                                                                                                                                                                                                                                                                                                                                                                                                                                                                                                                                                                                                                                                                                                                                                                                                                                                                                                                                                                                                                                                                                                                                                                                                                                                                                                                                                                                                                                                                                                                                                                                                                                                                                                                                                                                                                                                                                                                                                           |                               |       |
|----|---------------------------------------------------------------------------------------------------------------------------------------------------------------------------------------------------------------------------------------------------------------------------------------------------------------------------------------------------------------------------------------------------------------------------------------------------------------------------------------------------------------------------------------------------------------------------------------------------------------------------------------------------------------------------------------------------------------------------------------------------------------------------------------------------------------------------------------------------------------------------------------------------------------------------------------------------------------------------------------------------------------------------------------------------------------------------------------------------------------------------------------------------------------------------------------------------------------------------------------------------------------------------------------------------------------------------------------------------------------------------------------------------------------------------------------------------------------------------------------------------------------------------------------------------------------------------------------------------------------------------------------------------------------------------------------------------------------------------------------------------------------------------------------------------------------------------------------------------------------------------------------------------------------------------------------------------------------------------|-------------------------------|-------|
|    | <p>indication-specific OR indicate* OR indicating OR indication* OR "prescription-indication*" OR "indication code*" OR rationale OR rationalization OR non-indicat* OR non-indication* OR "not indicated" OR "without indicating" OR "missing indication" OR "reason for use" OR "reason for indication" OR "reason for prescribing" OR "purpose for use" OR "accountable justification" OR "indication* for use" OR "indication* of use" OR "instruction* for use" OR "indication* for treatment*" OR "documentation of indication*" OR "indication documentation*" OR "order writing" OR "writing process*" OR legible OR legibility OR illegibility OR illegible OR "notation* of purpose" OR "take as directed" OR "take as needed" OR "use as needed" OR "use as directed" OR ((guideline* OR standard* OR "best practice*") N2 (prescrib* OR e-prescrib* OR prescription* OR e-prescription* OR deprescrib* OR de-prescrib* OR "prescription-indication*")) ) OR SU ( (indication-based OR indication-specific OR indicate* OR indicating OR indication* OR "prescription-indication*" OR "indication code*" OR rationale OR rationalization OR non-indicat* OR non-indication* OR "not indicated" OR "without indicating" OR "missing indication" OR "reason for use" OR "reason for indication" OR "reason for prescribing" OR "purpose for use" OR "accountable justification" OR "indication* for use" OR "indication* of use" OR "instruction* for use" OR "indication* for treatment*" OR "documentation of indication*" OR "indication documentation*" OR "order writing" OR "writing process*" OR legible OR legibility OR illegibility OR illegible OR "notation* of purpose" OR "take as directed" OR "take as needed" OR "use as needed" OR "use as directed" OR ((guideline* OR standard* OR "best practice*") N2 (prescrib* OR e-prescrib* OR prescription* OR e-prescription* OR deprescrib* OR de-prescrib* OR "prescription-indication*")) ) )</p> |                               |       |
| S4 | S1 AND S2 AND S3                                                                                                                                                                                                                                                                                                                                                                                                                                                                                                                                                                                                                                                                                                                                                                                                                                                                                                                                                                                                                                                                                                                                                                                                                                                                                                                                                                                                                                                                                                                                                                                                                                                                                                                                                                                                                                                                                                                                                          | Search modes - Boolean/Phrase | 422   |
| S5 | <p>TI ( (((indication-based OR indication-specific OR indicate* OR indicating OR indication* OR rationale OR rationalization* OR non-indicat* OR non-indication* OR "not indicated" OR "without indicating" OR "missing indication") N2 (prescription* OR prescrib* OR e-prescrib* OR e-prescription* OR deprescrib* OR de-prescrib* OR overprescrib* OR medication* OR drug* OR therapy OR therapies OR treatment* OR "use" OR usage OR administration OR administer* OR instruction* OR direction* OR order OR orders OR course* OR duration* OR dose OR doses OR dosing OR dosage OR regimen* OR timing OR schedule* OR frequency OR documentation OR documented OR reason* OR purpose* OR label* OR off-label OR provider-selected OR physician* OR appropriate* OR inappropriate* OR correct* OR incorrect* OR missing OR without)) OR "prescription-indication*" OR "indication code*" OR "indication* for use" OR "indication* of use" OR</p>                                                                                                                                                                                                                                                                                                                                                                                                                                                                                                                                                                                                                                                                                                                                                                                                                                                                                                                                                                                                                      | Search modes - Boolean/Phrase | 1,730 |

"instruction\* for use" OR "indication\* for treatment\*" OR  
"documentation of indication\*" OR "indication  
documentation\*" OR "reason for use" OR "reason for  
indication" OR "reason for prescribing" OR "purpose for use"  
OR "accountable justification" OR "notation\* of purpose" OR  
"take as directed" OR "take as needed" OR "use as needed"  
OR "use as directed" OR "order writing" OR "writing  
process\*") ) OR MW ( (((indication-based OR indication-  
specific OR indicate\* OR indicating OR indication\* OR  
rationale OR rationalization\* OR non-indicat\* OR non-  
indication\* OR "not indicated" OR "without indicating" OR  
"missing indication") N2 (prescription\* OR prescrib\* OR e-  
prescrib\* OR e-prescription\* OR deprescrib\* OR de-prescrib\*  
OR overprescrib\* OR medication\* OR drug\* OR therapy OR  
therapies OR treatment\* OR "use" OR usage OR  
administration OR administer\* OR instruction\* OR direction\*  
OR order OR orders OR course\* OR duration\* OR dose OR  
doses OR dosing OR dosage OR regimen\* OR timing OR  
schedule\* OR frequency OR documentation OR documented  
OR reason\* OR purpose\* OR label\* OR off-label OR provider-  
selected OR physician\* OR appropriate\* OR inappropriate\*  
OR correct\* OR incorrect\* OR missing OR without)) OR  
"prescription-indication\*" OR "indication code\*" OR  
"indication\* for use" OR "indication\* of use" OR  
"instruction\* for use" OR "indication\* for treatment\*" OR  
"documentation of indication\*" OR "indication  
documentation\*" OR "reason for use" OR "reason for  
indication" OR "reason for prescribing" OR "purpose for use"  
OR "accountable justification" OR "notation\* of purpose" OR  
"take as directed" OR "take as needed" OR "use as needed"  
OR "use as directed" OR "order writing" OR "writing  
process\*") ) OR SU ( (((indication-based OR indication-  
specific OR indicate\* OR indicating OR indication\* OR  
rationale OR rationalization\* OR non-indicat\* OR non-  
indication\* OR "not indicated" OR "without indicating" OR  
"missing indication") N2 (prescription\* OR prescrib\* OR e-  
prescrib\* OR e-prescription\* OR deprescrib\* OR de-prescrib\*  
OR overprescrib\* OR medication\* OR drug\* OR therapy OR  
therapies OR treatment\* OR "use" OR usage OR  
administration OR administer\* OR instruction\* OR direction\*  
OR order OR orders OR course\* OR duration\* OR dose OR  
doses OR dosing OR dosage OR regimen\* OR timing OR  
schedule\* OR frequency OR documentation OR documented  
OR reason\* OR purpose\* OR label\* OR off-label OR provider-  
selected OR physician\* OR appropriate\* OR inappropriate\*  
OR correct\* OR incorrect\* OR missing OR without)) OR  
"prescription-indication\*" OR "indication code\*" OR  
"indication\* for use" OR "indication\* of use" OR  
"instruction\* for use" OR "indication\* for treatment\*" OR  
"documentation of indication\*" OR "indication  
documentation\*" OR "reason for use" OR "reason for  
indication" OR "reason for prescribing" OR "purpose for use"  
OR "accountable justification" OR "notation\* of purpose" OR



|     |                                                                                                                                                                                                                                                                                                                                                                                                                                                                                                                                                                                                                                                                                                                                                                                                                                                                                                                                                                                                                                                                                                                                                                                                                                                                                                                                                                                                                                                                                                                                                                           |                                                                                       |         |
|-----|---------------------------------------------------------------------------------------------------------------------------------------------------------------------------------------------------------------------------------------------------------------------------------------------------------------------------------------------------------------------------------------------------------------------------------------------------------------------------------------------------------------------------------------------------------------------------------------------------------------------------------------------------------------------------------------------------------------------------------------------------------------------------------------------------------------------------------------------------------------------------------------------------------------------------------------------------------------------------------------------------------------------------------------------------------------------------------------------------------------------------------------------------------------------------------------------------------------------------------------------------------------------------------------------------------------------------------------------------------------------------------------------------------------------------------------------------------------------------------------------------------------------------------------------------------------------------|---------------------------------------------------------------------------------------|---------|
|     | "take as directed" OR "take as needed" OR "use as needed" OR "use as directed" OR "order writing" OR "writing process*") )                                                                                                                                                                                                                                                                                                                                                                                                                                                                                                                                                                                                                                                                                                                                                                                                                                                                                                                                                                                                                                                                                                                                                                                                                                                                                                                                                                                                                                                |                                                                                       |         |
| S6  | (S1 OR S2) AND S5                                                                                                                                                                                                                                                                                                                                                                                                                                                                                                                                                                                                                                                                                                                                                                                                                                                                                                                                                                                                                                                                                                                                                                                                                                                                                                                                                                                                                                                                                                                                                         | Search modes - Boolean/Phrase                                                         | 648     |
| S7  | S4 OR S6                                                                                                                                                                                                                                                                                                                                                                                                                                                                                                                                                                                                                                                                                                                                                                                                                                                                                                                                                                                                                                                                                                                                                                                                                                                                                                                                                                                                                                                                                                                                                                  | Search modes - Boolean/Phrase                                                         | 1,060   |
| S8  | ( (MH "Central Nervous System Agents+") OR (MH "Psychotropic Drugs+") OR (MH "Antidepressive Agents+") OR (MH "Peripheral Nervous System Agents+") OR (MH "Analgesics+") OR (MH "Analgesics, Opioid+") OR (MH "Narcotics+") OR (MH "Hematologic Agents+") OR (MH "Anticoagulants") ) OR ( TI ( ((narcotic* OR opioid* OR fentanyl OR analgesic* OR naloxone OR anti-depress* OR anti-depress* OR antipsychotic* OR anti-psychotic* OR psychiatric OR psychoses OR psychotropic OR anticoagulant* OR antiplatelet* OR stroke*) N2 (drug* OR prescription* OR prescrib* OR e-prescrib* OR e-prescription* OR deprescrib* OR de-prescrib* OR overprescrib* OR medication* OR treatment* OR therapy OR therapies) ) ) OR MW ( ((narcotic* OR opioid* OR fentanyl OR analgesic* OR naloxone OR anti-depress* OR anti-depress* OR antipsychotic* OR anti-psychotic* OR psychiatric OR psychoses OR psychotropic OR anticoagulant* OR antiplatelet* OR stroke*) N2 (drug* OR prescription* OR prescrib* OR e-prescrib* OR e-prescription* OR deprescrib* OR de-prescrib* OR overprescrib* OR medication* OR treatment* OR therapy OR therapies) ) ) OR SU ( ((narcotic* OR opioid* OR fentanyl OR analgesic* OR naloxone OR anti-depress* OR anti-depress* OR antipsychotic* OR anti-psychotic* OR psychiatric OR psychoses OR psychotropic OR anticoagulant* OR antiplatelet* OR stroke*) N2 (drug* OR prescription* OR prescrib* OR e-prescrib* OR e-prescription* OR deprescrib* OR de-prescrib* OR overprescrib* OR medication* OR treatment* OR therapy OR therapies) ) ) ) | Search modes - Boolean/Phrase                                                         | 375,002 |
| S9  | S7 NOT S8                                                                                                                                                                                                                                                                                                                                                                                                                                                                                                                                                                                                                                                                                                                                                                                                                                                                                                                                                                                                                                                                                                                                                                                                                                                                                                                                                                                                                                                                                                                                                                 | Search modes - Boolean/Phrase                                                         | 859     |
| S10 | S9 NOT ((MH "Animals+") NOT (MH "Human"))                                                                                                                                                                                                                                                                                                                                                                                                                                                                                                                                                                                                                                                                                                                                                                                                                                                                                                                                                                                                                                                                                                                                                                                                                                                                                                                                                                                                                                                                                                                                 | Search modes - Boolean/Phrase                                                         | 851     |
| S11 | S10 NOT PT (Brief Item OR Commentary OR Editorial OR Letter)                                                                                                                                                                                                                                                                                                                                                                                                                                                                                                                                                                                                                                                                                                                                                                                                                                                                                                                                                                                                                                                                                                                                                                                                                                                                                                                                                                                                                                                                                                              | Search modes - Boolean/Phrase                                                         | 767     |
| S12 | S10 NOT PT (Brief Item OR Commentary OR Editorial OR Letter)                                                                                                                                                                                                                                                                                                                                                                                                                                                                                                                                                                                                                                                                                                                                                                                                                                                                                                                                                                                                                                                                                                                                                                                                                                                                                                                                                                                                                                                                                                              | Limiters - Published Date: 19900101-; Language: English Search modes - Boolean/Phrase | 756     |
| S13 | S12 AND MX Y                                                                                                                                                                                                                                                                                                                                                                                                                                                                                                                                                                                                                                                                                                                                                                                                                                                                                                                                                                                                                                                                                                                                                                                                                                                                                                                                                                                                                                                                                                                                                              | Search modes - Boolean/Phrase                                                         | 320     |

## INTERNATIONAL PHARMACEUTICAL ABSTRACTS (IPA)

EBSCOhost International Pharmaceutical Abstracts

| #  | Query                                                                                                                                                                                                                                                                                                                                                                                                                                                                                                                                                                                                                                                                                                                                                                                                                                                                                                                                                                                                                                                                                                                                                                                                                                                                                                                                                                                                                                                                                                                                                                                                                                                                                                                                                                                                                                                                                                                                                                                        | Limiters/Expanders            | Results |
|----|----------------------------------------------------------------------------------------------------------------------------------------------------------------------------------------------------------------------------------------------------------------------------------------------------------------------------------------------------------------------------------------------------------------------------------------------------------------------------------------------------------------------------------------------------------------------------------------------------------------------------------------------------------------------------------------------------------------------------------------------------------------------------------------------------------------------------------------------------------------------------------------------------------------------------------------------------------------------------------------------------------------------------------------------------------------------------------------------------------------------------------------------------------------------------------------------------------------------------------------------------------------------------------------------------------------------------------------------------------------------------------------------------------------------------------------------------------------------------------------------------------------------------------------------------------------------------------------------------------------------------------------------------------------------------------------------------------------------------------------------------------------------------------------------------------------------------------------------------------------------------------------------------------------------------------------------------------------------------------------------|-------------------------------|---------|
| S1 | TI ( (anti-infective* OR antiinfective* OR anti-biotic* OR antibiotic* OR anti-microb* OR antimicrob* OR antibacterial* OR anti-bacterial*) ) OR SU ( (anti-infective* OR antiinfective* OR anti-biotic* OR antibiotic* OR anti-microb* OR antimicrob* OR antibacterial* OR anti-bacterial*) )                                                                                                                                                                                                                                                                                                                                                                                                                                                                                                                                                                                                                                                                                                                                                                                                                                                                                                                                                                                                                                                                                                                                                                                                                                                                                                                                                                                                                                                                                                                                                                                                                                                                                               | Search modes - Boolean/Phrase | 43,500  |
| S2 | TI ( (prescription* OR prescrib* OR e-prescrib* OR e-prescription* OR deprescrib* OR de-prescrib* OR overprescrib* OR medication* OR (drug* N2 (therapy OR therapies OR treatment*))) ) OR SU ( (prescription* OR prescrib* OR e-prescrib* OR e-prescription* OR deprescrib* OR de-prescrib* OR overprescrib* OR medication* OR (drug* N2 (therapy OR therapies OR treatment*))) )                                                                                                                                                                                                                                                                                                                                                                                                                                                                                                                                                                                                                                                                                                                                                                                                                                                                                                                                                                                                                                                                                                                                                                                                                                                                                                                                                                                                                                                                                                                                                                                                           | Search modes - Boolean/Phrase | 54,800  |
| S3 | TI ( (indication-based OR indication-specific OR indicate* OR indicating OR indication* OR "prescription-indication*" OR "indication code*" OR rationale OR rationalization OR non-indicat* OR non-indication* OR "not indicated" OR "without indicating" OR "missing indication" OR "reason for use" OR "reason for indication" OR "reason for prescribing" OR "purpose for use" OR "accountable justification" OR "indication* for use" OR "indication* of use" OR "instruction* for use" OR "indication* for treatment*" OR "documentation of indication*" OR "indication documentation*" OR "order writing" OR "writing process*" OR legible OR legibility OR illegibility OR illegible OR "notation* of purpose" OR "take as directed" OR "take as needed" OR "use as needed" OR "use as directed" OR ((guideline* OR standard* OR "best practice*") N2 (prescrib* OR e-prescrib* OR prescription* OR e-prescription* OR deprescrib* OR de-prescrib* OR "prescription-indication*"))) ) OR SU ( (indication-based OR indication-specific OR indicate* OR indicating OR indication* OR "prescription-indication*" OR "indication code*" OR rationale OR rationalization OR non-indicat* OR non-indication* OR "not indicated" OR "without indicating" OR "missing indication" OR "reason for use" OR "reason for indication" OR "reason for prescribing" OR "purpose for use" OR "accountable justification" OR "indication* for use" OR "indication* of use" OR "instruction* for use" OR "indication* for treatment*" OR "documentation of indication*" OR "indication documentation*" OR "order writing" OR "writing process*" OR legible OR legibility OR illegibility OR illegible OR "notation* of purpose" OR "take as directed" OR "take as needed" OR "use as needed" OR "use as directed" OR ((guideline* OR standard* OR "best practice*") N2 (prescrib* OR e-prescrib* OR prescription* OR e-prescription* OR deprescrib* OR de-prescrib* OR "prescription-indication*"))) ) | Search modes - Boolean/Phrase | 4,380   |
| S4 | S1 AND S2 AND S3                                                                                                                                                                                                                                                                                                                                                                                                                                                                                                                                                                                                                                                                                                                                                                                                                                                                                                                                                                                                                                                                                                                                                                                                                                                                                                                                                                                                                                                                                                                                                                                                                                                                                                                                                                                                                                                                                                                                                                             | Search modes - Boolean/Phrase | 75      |
| S5 | TI ( (((indication-based OR indication-specific OR indicate* OR indicating OR indication* OR rationale OR rationalization* OR non-indicat* OR non-indication* OR "not indicated" OR "without indicating" OR "missing indication") N2 (prescription* OR prescrib* OR e-prescrib* OR e-prescription* OR deprescrib*                                                                                                                                                                                                                                                                                                                                                                                                                                                                                                                                                                                                                                                                                                                                                                                                                                                                                                                                                                                                                                                                                                                                                                                                                                                                                                                                                                                                                                                                                                                                                                                                                                                                            | Search modes - Boolean/Phrase | 2,634   |

|    |                                                                                                                                                                                                                                                                                                                                                                                                                                                                                                                                                                                                                                                                                                                                                                                                                                                                                                                                                                                                                                                                                                                                                                                                                                                                                                                                                                                                                                                                                                                                                                                                                                                                                                                                                                                                                                                                                                                                                                                                                                                                                                                                                                                                                                                                                                                                                                                                            |                               |       |
|----|------------------------------------------------------------------------------------------------------------------------------------------------------------------------------------------------------------------------------------------------------------------------------------------------------------------------------------------------------------------------------------------------------------------------------------------------------------------------------------------------------------------------------------------------------------------------------------------------------------------------------------------------------------------------------------------------------------------------------------------------------------------------------------------------------------------------------------------------------------------------------------------------------------------------------------------------------------------------------------------------------------------------------------------------------------------------------------------------------------------------------------------------------------------------------------------------------------------------------------------------------------------------------------------------------------------------------------------------------------------------------------------------------------------------------------------------------------------------------------------------------------------------------------------------------------------------------------------------------------------------------------------------------------------------------------------------------------------------------------------------------------------------------------------------------------------------------------------------------------------------------------------------------------------------------------------------------------------------------------------------------------------------------------------------------------------------------------------------------------------------------------------------------------------------------------------------------------------------------------------------------------------------------------------------------------------------------------------------------------------------------------------------------------|-------------------------------|-------|
|    | OR de-prescrib* OR overprescrib* OR medication* OR drug* OR therapy OR therapies OR treatment* OR "use" OR usage OR administration OR administer* OR instruction* OR direction* OR order OR orders OR course* OR duration* OR dose OR doses OR dosing OR dosage OR regimen* OR timing OR schedule* OR frequency OR documentation OR documented OR reason* OR purpose* OR label* OR off-label OR provider-selected OR physician* OR appropriate* OR inappropriate* OR correct* OR incorrect* OR missing OR without)) OR "prescription-indication*" OR "indication code*" OR "indication* for use" OR "indication* of use" OR "instruction* for use" OR "indication* for treatment*" OR "documentation of indication*" OR "indication documentation*" OR "reason for use" OR "reason for indication" OR "reason for prescribing" OR "purpose for use" OR "accountable justification" OR "notation* of purpose" OR "take as directed" OR "take as needed" OR "use as needed" OR "use as directed" OR "order writing" OR "writing process*" ) OR SU ( (((indication-based OR indication-specific OR indicate* OR indicating OR indication* OR rationale OR rationalization* OR non-indicat* OR non-indication* OR "not indicated" OR "without indicating" OR "missing indication") N2 (prescription* OR prescrib* OR e-prescrib* OR e-prescription* OR deprescrib* OR de-prescrib* OR overprescrib* OR medication* OR drug* OR therapy OR therapies OR treatment* OR "use" OR usage OR administration OR administer* OR instruction* OR direction* OR order OR orders OR course* OR duration* OR dose OR doses OR dosing OR dosage OR regimen* OR timing OR schedule* OR frequency OR documentation OR documented OR reason* OR purpose* OR label* OR off-label OR provider-selected OR physician* OR appropriate* OR inappropriate* OR correct* OR incorrect* OR missing OR without)) OR "prescription-indication*" OR "indication code*" OR "indication* for use" OR "indication* of use" OR "instruction* for use" OR "indication* for treatment*" OR "documentation of indication*" OR "indication documentation*" OR "reason for use" OR "reason for indication" OR "reason for prescribing" OR "purpose for use" OR "accountable justification" OR "notation* of purpose" OR "take as directed" OR "take as needed" OR "use as needed" OR "use as directed" OR "order writing" OR "writing process*" ) ) |                               |       |
| S6 | (S1 OR S2) AND S5                                                                                                                                                                                                                                                                                                                                                                                                                                                                                                                                                                                                                                                                                                                                                                                                                                                                                                                                                                                                                                                                                                                                                                                                                                                                                                                                                                                                                                                                                                                                                                                                                                                                                                                                                                                                                                                                                                                                                                                                                                                                                                                                                                                                                                                                                                                                                                                          | Search modes - Boolean/Phrase | 573   |
| S7 | S4 OR S6                                                                                                                                                                                                                                                                                                                                                                                                                                                                                                                                                                                                                                                                                                                                                                                                                                                                                                                                                                                                                                                                                                                                                                                                                                                                                                                                                                                                                                                                                                                                                                                                                                                                                                                                                                                                                                                                                                                                                                                                                                                                                                                                                                                                                                                                                                                                                                                                   | Search modes - Boolean/Phrase | 630   |
| S8 | TI ( ((narcotic* OR opioid* OR fentanyl OR analgesic* OR naloxone OR anti-depress* OR anti-depress* OR antipsychotic* OR anti-psychotic* OR psychiatric OR psychoses OR psychotropic OR anticoagulant* OR antiplatelet* OR stroke*) N2 (drug* OR prescription* OR prescrib* OR e-prescrib* OR e-prescription* OR deprescrib* OR de-prescrib* OR overprescrib* OR medication* OR treatment* OR therapy OR therapies)) ) OR SU ( ((narcotic* OR opioid* OR fentanyl OR analgesic* OR naloxone OR anti-depress* OR anti-depress* OR antipsychotic* OR anti-psychotic* OR psychiatric OR psychoses OR                                                                                                                                                                                                                                                                                                                                                                                                                                                                                                                                                                                                                                                                                                                                                                                                                                                                                                                                                                                                                                                                                                                                                                                                                                                                                                                                                                                                                                                                                                                                                                                                                                                                                                                                                                                                          | Search modes - Boolean/Phrase | 8,077 |

|                                                                                                                                                                                                                                                          |           |                                                                             |     |
|----------------------------------------------------------------------------------------------------------------------------------------------------------------------------------------------------------------------------------------------------------|-----------|-----------------------------------------------------------------------------|-----|
| psychotropic OR anticoagulant* OR antiplatelet* OR stroke*)<br>N2 (drug* OR prescription* OR prescrib* OR e-prescrib* OR e-<br>prescription* OR deprescrib* OR de-prescrib* OR overprescrib*<br>OR medication* OR treatment* OR therapy OR therapies)) ) |           |                                                                             |     |
| S9                                                                                                                                                                                                                                                       | S7 NOT S8 | Search modes -<br>Boolean/Phrase                                            | 607 |
| S10                                                                                                                                                                                                                                                      | S7 NOT S8 | Limiters - Published<br>Date: 19900101-<br>Search modes -<br>Boolean/Phrase | 429 |

Search Results: 2121
